# Supplementary material for: A potent 2′-O-methylated RNA-based microRNA inhibitor with unique secondary structures
Source: PubMed Central journal article supplement — Nucleic Acids Res. 2012 Jan 17;40(8):e58. doi: 10.1093/nar/gkr1317 (PMC3333889; doi:10.1093/nar/gkr1317), 2012-01-17
Supplement: supp_gkr1317_nar-01187-met-g-2011-File010.pdf [file supp_gkr1317_nar-01187-met-g-2011-File010.pdf]

## Supplementary Figure legends

**Supplementary Figure S1.** Structures of the luciferase expression vectors used in this study. (A) Structure of the *firefly* luciferase expression plasmid vector, pTK4.12. (B) Structure of the *Renilla* luciferase reporter without insertion; pGL4.74. (C) Structure of the *Renilla* luciferase reporter pGL4.74-miR21T harbouring a 22bp insert which is fully complementary to the mature miR-21 just downstream of the *Renilla* luciferase gene. (D) Structure of the *Renilla* luciferase reporter pGL4.74-miR200cT containing a 23bp insert, which is fully complementary to mature miR-200c, just downstream of the *Renilla* luciferase gene. (E) Structure of the *Renilla* luciferase reporter pGL4.74-miR16T with a 22bp insert just downstream of the *Renilla* luciferase gene which is fully complementary to mature miR-16. (F) Structure of the *Renilla* luciferase reporter pGL4.74-miR106bT containing a 21bp insert just downstream of the *Renilla* luciferase gene which is fully complementary to the mature miR-106b.

**Supplementary Figure S2.** Inhibitory effects of 2'-O-methylated RNA and PNA

AMOs. 2'-O-methylated RNA oligonucleotide-based antisense or PNA

oligonucleotide-based antisense molecules were transfected into HCT-116 cells together with the *Renilla* luciferase miR-21 reporter (miR-21-RL) or the untargeted control

*Renilla* luciferase reporter (UT-RL), as well as the *Firefly* luciferase reporter (FL) as a transfection control. After performing a dual luciferase assay, the ratios of miR-21-RL/FL to UT-RL/FL expression were determined and are represented by the mean  $\pm$  s.d (n = 3). These expression levels were normalized to the ratio of miR-21-RL/FL to UT-RL/FL in 2'-OMe-NC transfected HCT-116 cells and are represented by the mean  $\pm$  s.d (n = 3).

**Supplementary Figure S3.** Sequence and structure of S-TuD for miR-21, miR-200c, miR-16 and miR-106b. MBS is the miRNA binding site, which is fully or partially complementary to the target miRNA (left). G-U pairs are indicated by a dot. A 4 nt insertion and 1 nt mismatch in the MBS regions of S-TuD molecules are represented by red and blue characters, respectively.

**Supplementary Figure S4.** Effects of the Stem I length on miRNA inhibiting activity of S-TuD molecules. (A) Structures and sequences of S-TuD-miR21, S-TuD-miR21-14bp and S-TuD-miR21-10bp. A 1 nt mismatch in the MBS regions within S-TuD is represented by blue characters. (B) The miR-21 inhibiting activity of the three types of S-TuD-miR21s was assessed by luciferase activity. HCT-116 cells

were co-transfected with the *Renilla* luciferase miR-21 reporter (miR-21-RL; open bars) or the untargeted control *Renilla* luciferase reporter (UT-RL; black bars) as well as the *Firefly* luciferase reporter (FL) as a transfection control. After performing a dual luciferase assay, the expression levels were normalized to the ratio of the activity of miR-21-RL to that of FL in 1 nM S-TuD-NC transfected HCT-116 cells and are represented by the mean  $\pm$  s.d (n = 3). (C) Normalized UV melting curves for 1.5  $\mu$ M of S-TuDs, S-TuD-miR21-10mut, S-TuD-miR21-10mut-stemI-14bp and S-TuD-miR21-10mut-stemI-10bp, in buffers of 10 mM sodium phosphate (pH 7.0) containing 10 mM NaCl. Melting was assessed by UV absorbance at 260 nm and a melting rate of 0.5  $^{\circ}$ C/min. Vertical black bars indicate  $T_m$  points.

**Supplementary Figure S5.** The levels of free miR-106b detected in RNA from HCT-116 cells transfected with miRNA inhibitors at concentrations of 0.05 nM by quantitative real time RT-PCR. The miR-106b expression levels were normalized to those of HCT-116 cells transfected with S-TuD-NC and are represented by the mean  $\pm$  s.d (n = 3). U6 snRNA was served as an endogenous control.

**Supplementary Figure S6.** (A) The expression levels of miR-200b/200c/429 family in HCT-116 cells. The expression levels of miRNAs were determined by miRNA-microarray (Agilent). (B) Sequence and structure (predicted by CentroidFold) of S-TuD-miR200c-pf and S-TuD-miR429-pf. (C) The expression levels of miR-15a/15b/16/195/424/497 family in HCT-116 cells. The expression levels of miRNAs were determined by miRNA-microarray (Agilent). (D) Sequence and structure (predicted by CentroidFold) of S-TuD-miR16-pf, S-TuD-miR195-pf and S-TuD-miR497-pf.

**Supplementary Figure S7.** The miRNA inhibitory effects and 5-FAM levels of 5-FAM labeled S-TuD and sorting of 5-FAM positive cells. (A) Comparison of the miRNA inhibitory effects of non-labeled and 5-FAM-labeled S-TuD. S-TuD-miR200c-pf, S-TuD-NC, 5-FAM-S-TuD-miR200c-pf or 5-FAM-S-TuD-NC were transiently transfected into HCT-116 cells together with the *Renilla* luciferase miR-200c reporter (miR-200c-RL; open bars) or the untargeted control *Renilla* luciferase reporter (UT-RL; black bars). In all cases, the *Firefly* luciferase reporter (FL) was co-transfected as a transfection control. After performing a dual luciferase assay, the expression levels were normalized to the ratio of the activity of miR-200c-RL to that of FL in 0.03 nM

S-TuD-NC transfected HCT-116 cells and are represented by the mean  $\pm$  s.d (n = 3).

Two days after the transfection FACS analysis of the 5-FAM levels in MOCK-treated

HCT-116 cells (**B**), 10 nM 5-FAM-S-TuD-NC transfected HCT-116 cells (**C**) or 10 nM

5-FAM-S-TuD-miR200c-pf transfected HCT-116 cells (**D**) was performed. M1 markers

represent the gates used for sorting.

**Supplementary Figure S8.** TuD-miR200c-expression lentivirus vector. (**A**) Structure

of a HIV-based self-inactivating TuD RNA expression vector, pLSP. The provirus

structure of pLSP is shown.  $\Delta$ U3, U3 sequence in which the major enhancer

sequences were deleted; R, lentiviral R sequence; U5, lentiviral U5 sequence;  $\psi$ ,

lentiviral packaging signal. (**B**) A TuD RNA expression lentivirus vector was

transduced into HCT-116 cells with an MOI of three followed by selection with

puromycin. These cells were transfected with the *Renilla* luciferase miR-200c

reporter (miR-200c-RL; open bars) or the untargeted control *Renilla* luciferase reporter

(UT-RL; black bars) as well as the *Firefly* luciferase reporter (FL) as a transfection

control at 13 days after transduction. A dual luciferase assay was performed at 15

days after transduction, after which the expression levels were normalized to the ratio

of the activity of miR-200c-RL to that of FL in TuD-NC vector-transduced HCT-116 cells. These values are represented by the mean  $\pm$  s.d (n = 3).

# Supplementary Figure S1

**A** pTK4.12

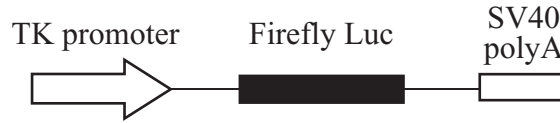

**B** pGL4.74

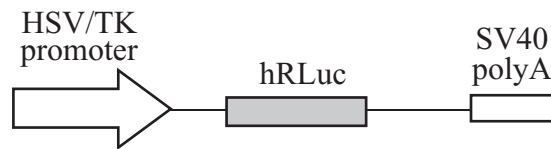

**C** pGL4.74-miR21T

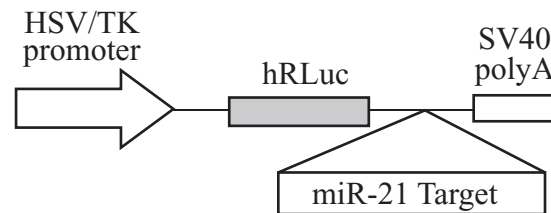

**D** pGL4.74-miR200cT

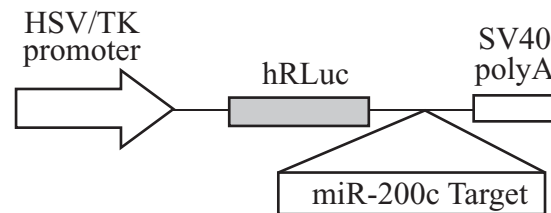

**E** pGL4.74-miR16T

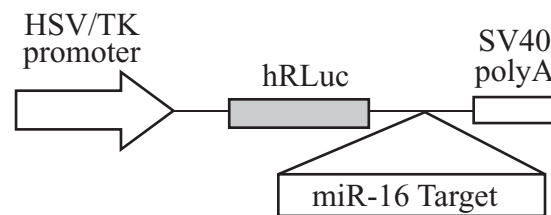

**F** pGL4.74-miR106bT

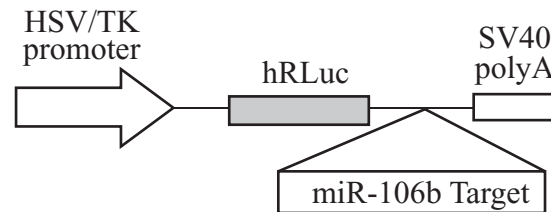

## Supplementary Figure S2

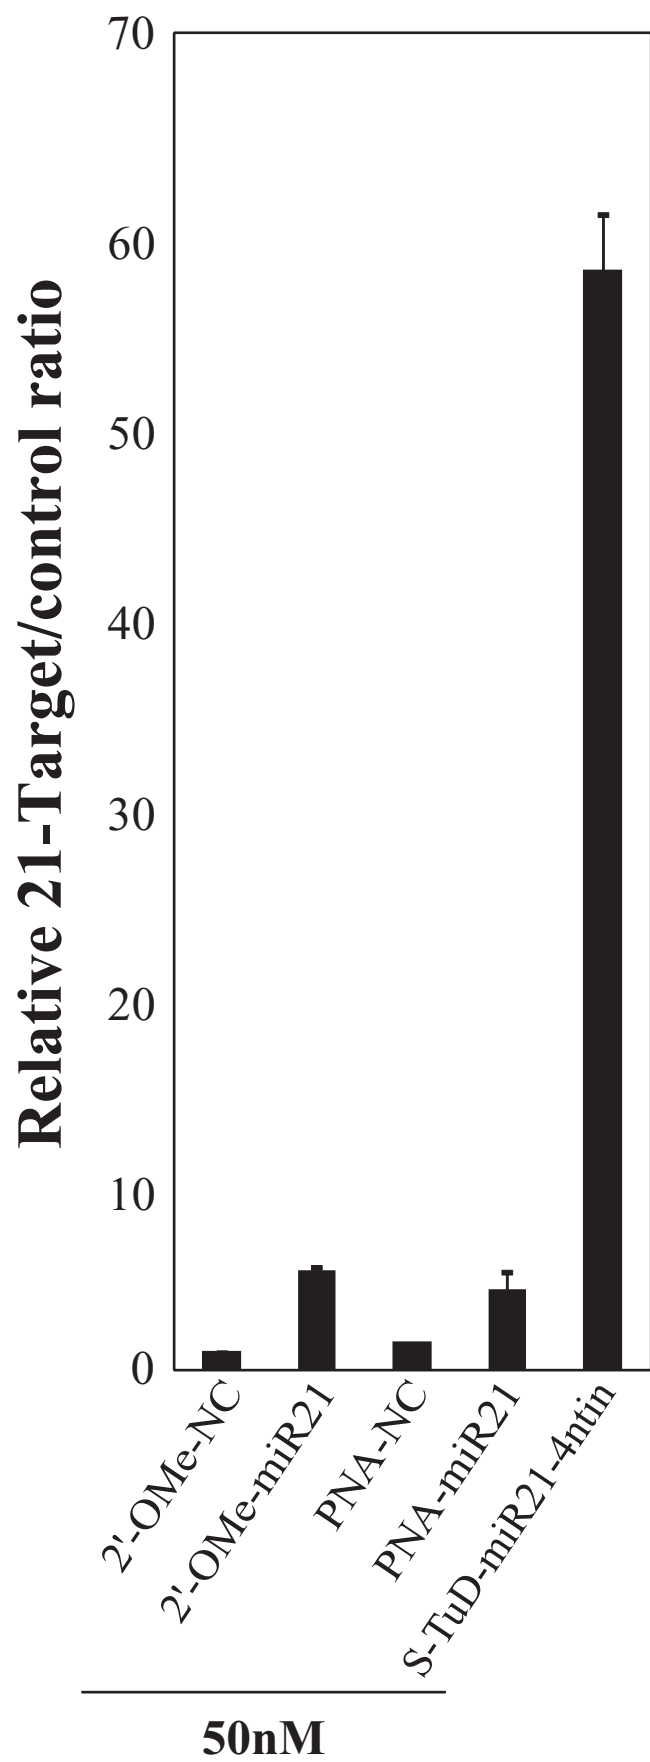



# Supplementary Figure S3

|                                                                                                                    |                                                                                                                                                                                                                                                                                   |
|--------------------------------------------------------------------------------------------------------------------|-----------------------------------------------------------------------------------------------------------------------------------------------------------------------------------------------------------------------------------------------------------------------------------|
| <p><b>S-TuD-miR21-pf</b></p>                                                                                       | <p style="text-align: center;">MBS</p> <pre> AACUCAAC- U AAGCUACAA 5'- GACGGCGCUAGGAUCAUC AUCAG CUGAU GUAUUCUGGU -3' 3'- CUGCCGCGAUCCUAGUAG UAGUC GACUA CAUAAGACCA -5' AACAU CGAA U -CAACUCAAA </pre> <p style="text-align: center;">MBS</p>                                      |
| <p>MBS 5'- UCAACAUCAGUCUGAUUAGCUA -3'<br/>miR-21 3'- AGUUGUAGUCAGACUAUUCGAU -5'</p>                                |                                                                                                                                                                                                                                                                                   |
| <p><b>S-TuD-miR21-4ntin</b></p>                                                                                    | <p style="text-align: center;">MBS</p> <pre> AACUCAACA- AGU AAU -U- UAAGCUACAA 5'- GACGGCGCUAGGAUCAUC UC C G GA GUAUUCUGGU -3' 3'- CUGCCGCGAUCCUAGUAG AG G UAA C CU CAUAAGACCA -5' AACAU CGAA -U- UGA -ACAACUCAAA </pre> <p style="text-align: center;">MBS</p>                   |
| <p>MBS 5'- UCAACAUCAGUC<sup>AU</sup>UGAUUAGCUA -3'<br/>miR-21 3'- AGUUGUAGUCAG<sup>A G</sup>--ACUAUUCGAU -5'</p>   |                                                                                                                                                                                                                                                                                   |
| <p><b>S-TuD-miR21-10mut</b></p>                                                                                    | <p style="text-align: center;">MBS</p> <pre> AACUCAAC- A U C AAGCUACAA 5'- GACGGCGCUAGGAUCAUC AUC G C GAU GUAUUCUGGU -3' 3'- CUGCCGCGAUCCUAGUAG UAG C G CUA CAUAAGACCA -5' AACAU CGAA C U A -CAACUCAAA </pre> <p style="text-align: center;">MBS</p>                              |
| <p>MBS 5'- UCAACAUCAGUC<sup>C</sup>GAUAAGCUA -3'<br/>miR-21 3'- AGUUGUAGUCAG<sup>A</sup>CUAUUCGAU -5'</p>          |                                                                                                                                                                                                                                                                                   |
| <p><b>S-TuD-miR200c-pf</b></p>                                                                                     | <p style="text-align: center;">MBS</p> <pre> AACUCCAUCAUUAC CCGG CA -----UAUUACAA 5'- GACGGCGCUAGGAUCAUC G G GUAUUCUGGU -3' 3'- CUGCCGCGAUCCUAGUAG GGCC --C CAUAAGACCA -5' AACAUU AUGAC --- AUUACUACCUCAA </pre> <p style="text-align: center;">MBS</p>                           |
| <p>MBS 5'- UCCAUCAUUACCCGGCAGUAUUA -3'<br/>miR-200c 3'- AGGUAGUAAUGGGCCGUCAUAAU -5'</p>                            |                                                                                                                                                                                                                                                                                   |
| <p><b>S-TuD-miR200c-4ntin</b></p>                                                                                  | <p style="text-align: center;">MBS</p> <pre> AACUCCAUCAU C - C CA UGG CA -----UUACAA 5'- GACGGCGCUAGGAUCAUC UAC CCA UGG GUA GUAUUCUGGU -3' 3'- CUGCCGCGAUCCUAGUAG AUG GGU ACC CAU CAUAAGACCA -5' AACAUU - - - - AC C -C UACUACCUCAA </pre> <p style="text-align: center;">MBS</p> |
| <p>MBS 5'- UCCAUCAUUACCC<sup>AC</sup>GCAGUAUUA -3'<br/>miR-200c 3'- AGGUAGUAAUGGG<sup>C U</sup>--CGUCAUAAU -5'</p> |                                                                                                                                                                                                                                                                                   |
| <p><b>S-TuD-miR200c-10mut</b></p>                                                                                  | <p style="text-align: center;">MBS</p> <pre> AACUCCAUCAUUACCCA GC -----AGUAUUACAA 5'- GACGGCGCUAGGAUCAUC GC GUAUUCUGGU -3' 3'- CUGCCGCGAUCCUAGUAG CG CAUAAGACCA -5' AACAUU AUGA - - - - - ACCCAUUAUCUACCUCAA </pre> <p style="text-align: center;">MBS</p>                        |
| <p>MBS 5'- UCCAUCAUUACCC<sup>A</sup>GCAGUAUUA -3'<br/>miR-200c 3'- AGGUAGUAAUGGG<sup>C</sup>CGUCAUAAU -5'</p>      |                                                                                                                                                                                                                                                                                   |
| <p><b>S-TuD-miR16-pf</b></p>                                                                                       | <p style="text-align: center;">MBS</p> <pre> AACCC- CAAUUAUUU --GCU-- UACAA 5'- GACGGCGCUAGGAUCAUC GC ACGU GC GUAUUCUGGU -3' 3'- CUGCCGCGAUCCUAGUAG CG UGCA CG CAUAAGACCA -5' AACAU - - -UCG-- UUUUAUAC -CCAA </pre> <p style="text-align: center;">MBS</p>                       |
| <p>MBS 5'- CGCCAAUUAUUUACGUGCUGCUA -3'<br/>miR-16 3'- GCGGUUAUAAAUGCACGACGAU -5'</p>                               |                                                                                                                                                                                                                                                                                   |
| <p><b>S-TuD-miR16-4ntin</b></p>                                                                                    | <p style="text-align: center;">MBS</p> <pre> AACCC- CAAUUAUUU G UUC CCGUGC UACAA 5'- GACGGCGCUAGGAUCAUC GC GUAUUCUGGU -3' 3'- CUGCCGCGAUCCUAGUAG CG UCGUGC C UUAUUUAAC -CCAA AACAU CG </pre> <p style="text-align: center;">MBS</p>                                               |
| <p>MBS 5'- CGCCAAUUAUUU<sup>UU</sup>CGUGCUGCUA -3'<br/>miR-16 3'- GCGGUUAUAAA<sup>G C</sup>--GCACGACGAU -5'</p>    |                                                                                                                                                                                                                                                                                   |
| <p><b>S-TuD-miR16-10mut</b></p>                                                                                    | <p style="text-align: center;">MBS</p> <pre> AACCC- CAAUUAUUU U GUGC UACAA 5'- GACGGCGCUAGGAUCAUC GC GUAUUCUGGU -3' 3'- CUGCCGCGAUCCUAGUAG CG UCGUUAUUUAUAC -CCAA AACAU CG </pre> <p style="text-align: center;">MBS</p>                                                          |
| <p>MBS 5'- CGCCAAUUAUUU<sup>U</sup>CGUGCUGCUA -3'<br/>miR-16 3'- GCGGUUAUAAA<sup>U</sup>GCACGACGAU -5'</p>         |                                                                                                                                                                                                                                                                                   |
| <p><b>S-TuD-miR106b-pf</b></p>                                                                                     | <p style="text-align: center;">MBS</p> <pre> AACAU CU - - CA U ACUUUACAA 5'- GACGGCGCUAGGAUCAUC G CUG CAG - - C GUAUUCUGGU -3' 3'- CUGCCGCGAUCCUAGUAG C - -GAC GUC G CAUAAGACCA -5' AACAUU UCA U AC - -UCUACAA </pre> <p style="text-align: center;">MBS</p>                      |
| <p>MBS 5'- AUCUGCACUGUCAGCACUUUA -3'<br/>miR-106b 3'- UAGACGUGACAGUCGUGAAAU -5'</p>                                |                                                                                                                                                                                                                                                                                   |

# Supplementary Figure S4

## A

### S-TuD-miR21-10mut

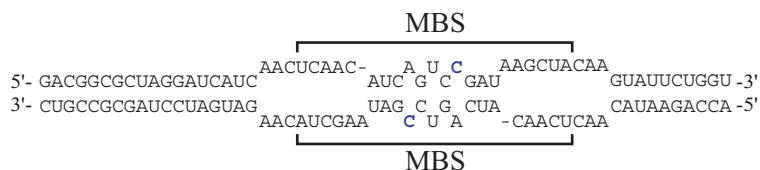

### S-TuD-miR21-10mut-stemI-14bp

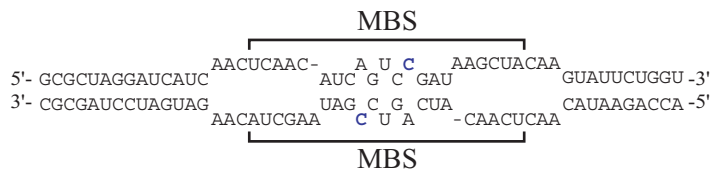

### S-TuD-miR21-10mut-stemI-10bp

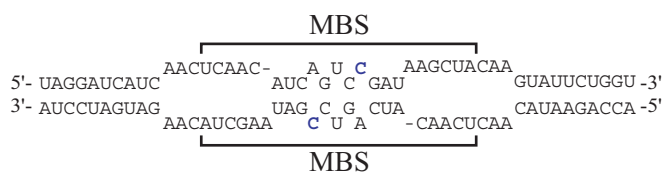

## B

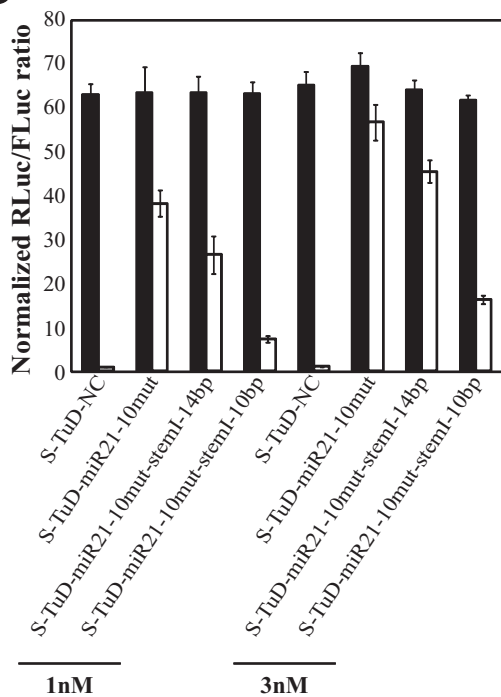

## C

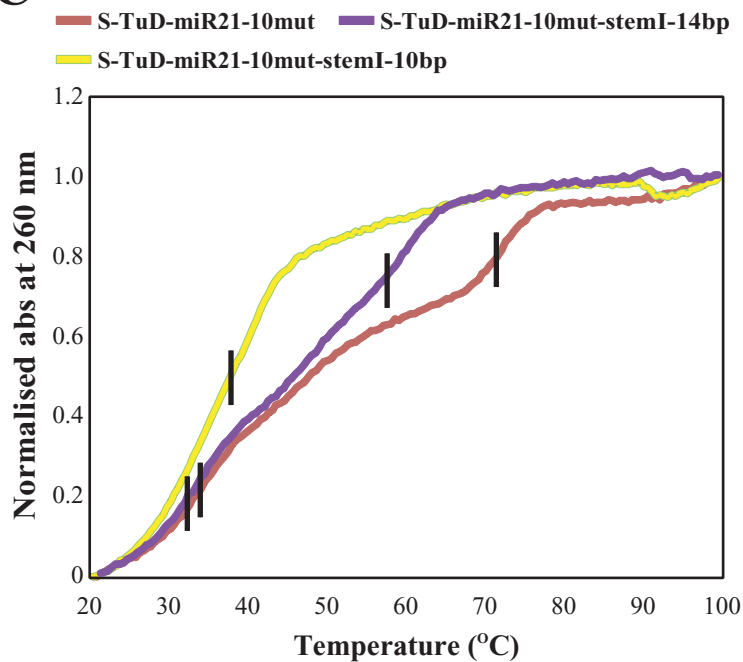

# Supplementary Figure S5

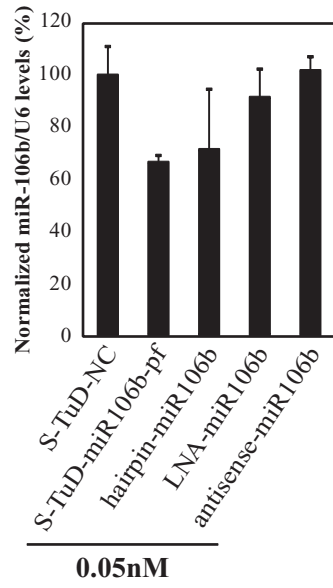

# Supplementary Figure S6

**A**

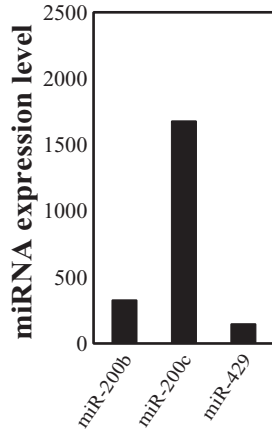

**B**

**S-TuD-miR200c-pf**

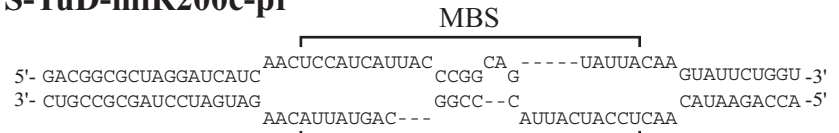

**S-TuD-miR429-pf**

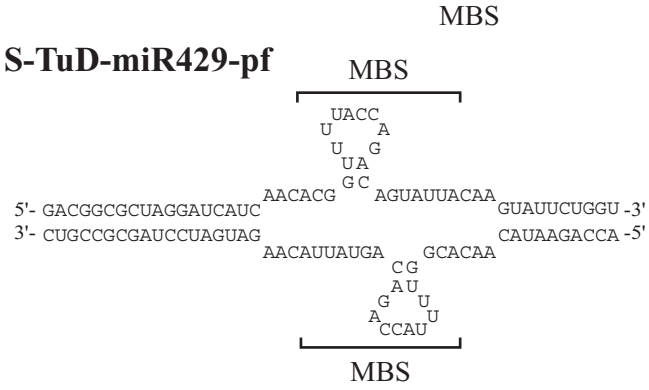

**C**

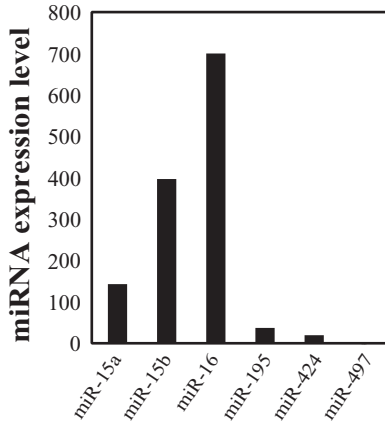

**D**

**S-TuD-miR16-pf**

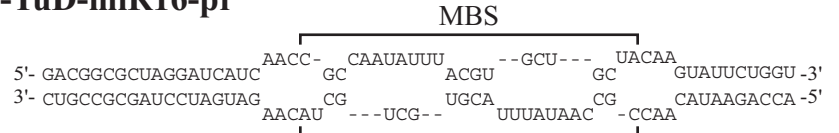

**S-TuD-miR195-pf**

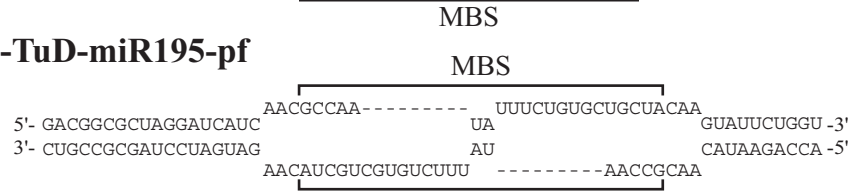

**S-TuD-miR497-pf**

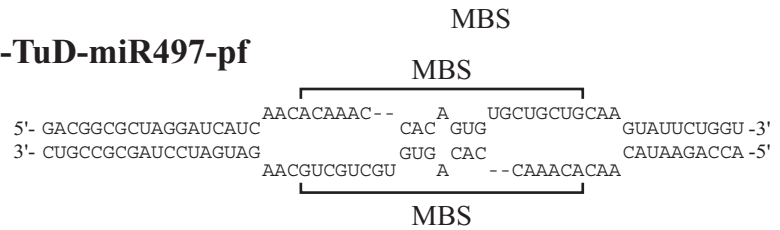

# Supplementary Figure S7

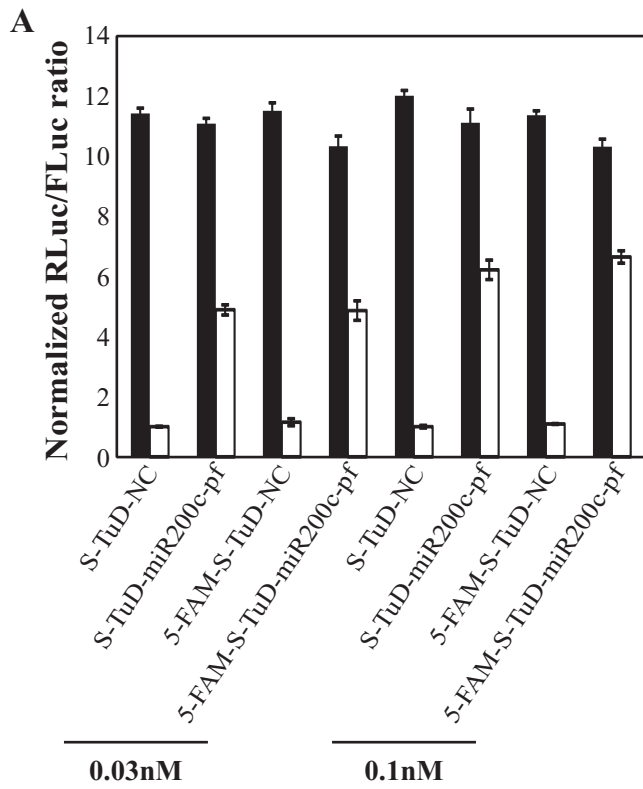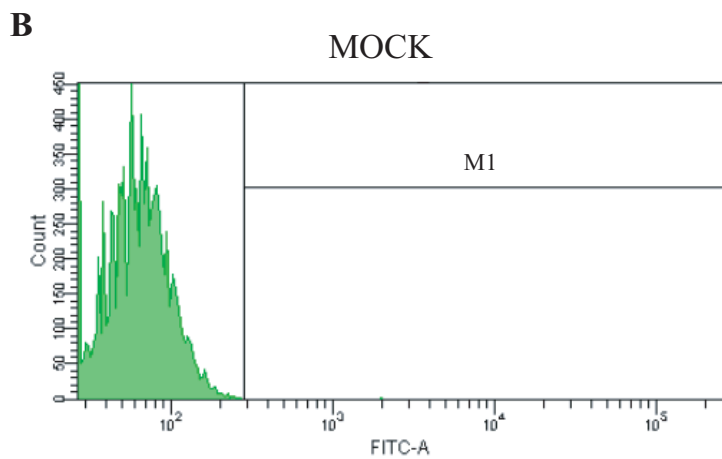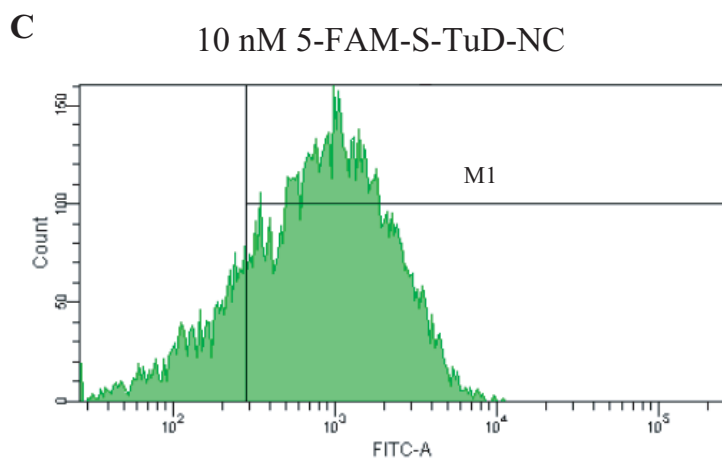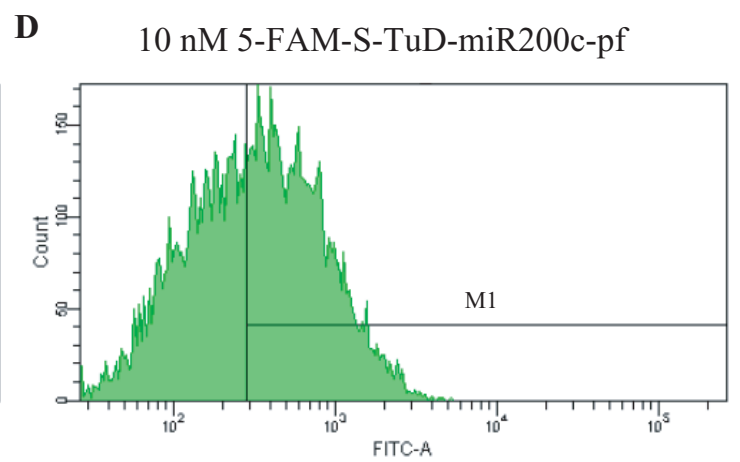

# Supplementary Figure S8

**A**

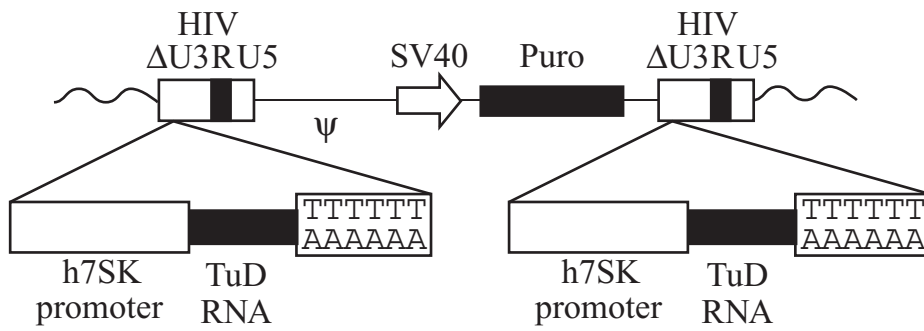

**B**

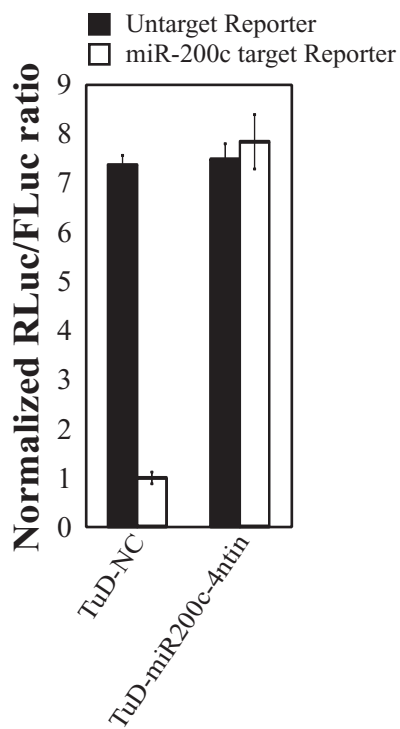

15 days after transduction

**Supplementary Table S1.** The 2'-O-methylated RNA oligo pairs for S-TuD preparation.

| Primers                      | Sequence                                                                         |
|------------------------------|----------------------------------------------------------------------------------|
| S-TuD-miR21-pf               | s <sup>+</sup> 5'- GACGGCGCUAGGAUCAUCAACUCAACAUCAGUCUGAUAAAGCUACAAGUAUUCUGGU -3' |
| S-TuD-miR21-pf               | a <sup>+</sup> 5'- ACCAGAAUACAACUCAACAUCAGUCUGAUAAAGCUACAAGAUGAUCCUAGCGCCGUC -3' |
| S-TuD-miR21-4ntin            | s 5'- GACGGCGCUAGGAUCAUCAACUCAACAUCAGUCA AUGUGAUAAAGCUACAAGUAUUCUGGU -3'         |
| S-TuD-miR21-4ntin            | a 5'- ACCAGAAUACAACUCAACAUCAGUCA AUGUGAUAAAGCUACAAGAUGAUCCUAGCGCCGUC -3'         |
| S-TuD-miR21-10mut            | s 5'- GACGGCGCUAGGAUCAUCAACUCAACAUCAGUCCGAUAAAGCUACAAGUAUUCUGGU -3'              |
| S-TuD-miR21-10mut            | a 5'- ACCAGAAUACAACUCAACAUCAGUCCGAUAAAGCUACAAGAUGAUCCUAGCGCCGUC -3'              |
| S-TuD-miR21-10mut-stemI-10bp | s 5'- UAGGAUCAUCAACUCAACAUCAGUCCGAUAAAGCUACAAGUAUUCUGGU -3'                      |
| S-TuD-miR21-10mut-stemI-10bp | a 5'- ACCAGAAUACAACUCAACAUCAGUCCGAUAAAGCUACAAGAUGAUCCUA -3'                      |
| S-TuD-miR21-10mut-stemI-14bp | s 5'- GCGCUAGGAUCAUCAACUCAACAUCAGUCCGAUAAAGCUACAAGUAUUCUGGU -3'                  |
| S-TuD-miR21-10mut-stemI-14bp | a 5'- ACCAGAAUACAACUCAACAUCAGUCCGAUAAAGCUACAAGAUGAUCCUAGCGC -3'                  |
| S-TuD-miR200c-pf             | s 5'- GACGGCGCUAGGAUCAUCAACUCCAUCAUUAACCCGGCAGUAUUACAAGUAUUCUGGU -3'             |
| S-TuD-miR200c-pf             | a 5'- ACCAGAAUACAACUCCAUCAUUAACCCGGCAGUAUUACAAGAUGAUCCUAGCGCCGUC -3'             |
| S-TuD-miR200c-4ntin          | s 5'- GACGGCGCUAGGAUCAUCAACUCCAUCAUUAACCCACUGGCAGUAUUACAAGUAUUCUGGU -3'          |
| S-TuD-miR200c-4ntin          | a 5'- ACCAGAAUACAACUCCAUCAUUAACCCACUGGCAGUAUUACAAGAUGAUCCUAGCGCCGUC -3'          |
| S-TuD-miR200c-10mut          | s 5'- GACGGCGCUAGGAUCAUCAACUCCAUCAUUAACCCAGCAGUAUUACAAGUAUUCUGGU -3'             |
| S-TuD-miR200c-10mut          | a 5'- ACCAGAAUACAACUCCAUCAUUAACCCAGCAGUAUUACAAGAUGAUCCUAGCGCCGUC -3'             |
| S-TuD-miR16-pf               | s 5'- GACGGCGCUAGGAUCAUCAACCGCCAAUAUUUACGUGCUGCUACAAGUAUUCUGGU -3'               |
| S-TuD-miR16-pf               | a 5'- ACCAGAAUACAACCGCCAAUAUUUACGUGCUGCUACAAGAUGAUCCUAGCGCCGUC -3'               |
| S-TuD-miR16-4ntin            | s 5'- GACGGCGCUAGGAUCAUCAACCGCCAAUAUUUAGUUCGUGCUGCUACAAGUAUUCUGGU -3'            |
| S-TuD-miR16-4ntin            | a 5'- ACCAGAAUACAACCGCCAAUAUUUAGUUCGUGCUGCUACAAGAUGAUCCUAGCGCCGUC -3'            |
| S-TuD-miR16-10mut            | s 5'- GACGGCGCUAGGAUCAUCAACCGCCAAUAUUUAUGUGCUGCUACAAGUAUUCUGGU -3'               |
| S-TuD-miR16-10mut            | a 5'- ACCAGAAUACAACCGCCAAUAUUUAUGUGCUGCUACAAGAUGAUCCUAGCGCCGUC -3'               |
| S-TuD-miR106b-pf             | s 5'- GACGGCGCUAGGAUCAUCAACAUCUGCACUGUCAGCACUUUACAAGAUGAUCCUAGCGCCGUC -3'        |
| S-TuD-miR106b-pf             | a 5'- ACCAGAAUACAACAUCUGCACUGUCAGCACUUUACAAGAUGAUCCUAGCGCCGUC -3'                |
| S-TuD-miR195-pf              | s 5'- GACGGCGCUAGGAUCAUCAACGCCAAUAUUUCUGUGCUGCUACAAGUAUUCUGGU -3'                |
| S-TuD-miR195-pf              | a 5'- ACCAGAAUACAACGCCAAUAUUUCUGUGCUGCUACAAGAUGAUCCUAGCGCCGUC -3'                |
| S-TuD-miR497-pf              | s 5'- GACGGCGCUAGGAUCAUCAACACAAACCACAGUGUGCUGCUGCAAGUAUUCUGGU -3'                |
| S-TuD-miR497-pf              | a 5'- ACCAGAAUACAACACAAACCACAGUGUGCUGCUGCAAGUAUGAUCCUAGCGCCGUC -3'               |
| S-TuD-miR429-pf              | s 5'- GACGGCGCUAGGAUCAUCAACACGGUUUUACCAGACAGUAUUACAAGUAUUCUGGU -3'               |
| S-TuD-miR429-pf              | a 5'- ACCAGAAUACAACACGGUUUUACCAGACAGUAUUACAAGAUGAUCCUAGCGCCGUC -3'               |
| S-TuD-NC                     | s 5'- GACGGCGCUAGGAUCAUCAACUAUCGCGAGUAUCGACGUCGAGGCCCAAGUAUUCUGGU -3'            |
| S-TuD-NC                     | a 5'- ACCAGAAUACAACUAUCGCGAGUAUCGACGUCGAGGCCCAAGUAUGAUCCUAGCGCCGUC -3'           |

s<sup>+</sup>; sense stranda<sup>+</sup>; antisense strand

**Supplementary Table S2.** Information of purchased miRNA inhibitors.

| miRNA inhibitors                 | Product name                            | Product code                 | Supplier          | Characteristics                                                                                                                                                                                                                                                                                                                                           |
|----------------------------------|-----------------------------------------|------------------------------|-------------------|-----------------------------------------------------------------------------------------------------------------------------------------------------------------------------------------------------------------------------------------------------------------------------------------------------------------------------------------------------------|
| hairpin-miR21<br>hairpin-miR106b | miRIDIAN microRNA<br>Hairpin Inhibitors | IH-300492-05<br>IH-300649-07 | Thermo Scientific | The entire oligoribonucleotides are 2' -O-methylated and miRIDIAN microRNA Hairpin Inhibitors might contain some other modifications. In miRIDIAN microRNA Hairpin Inhibitor, a single antisense strand of the miRNA are flanked by oligonucleotides at the 5' and 3' ends, both of which are designed to form hairpin structure with a 8 base-pair stem. |
| LNA-miR200c<br>LNA-miR106b       | miRCURY LNA™<br>microRNA Inhibitor      | 410126-00<br>426648-00       | Exiqon            | The sequence of miRCURY LNA™ microRNA inhibitors are completely complementary to the corresponding miRNA and spiked by LNA.                                                                                                                                                                                                                               |
| antisense-miR106b                | Anti-miR™ miRNA<br>Inhibitor            | AM10067                      | Life Technologies | Anti-miR™ miRNA Inhibitor is 2' -O-methylated oligoribonucleotides that is fully complementary to the corresponding miRNA.                                                                                                                                                                                                                                |



**Supplementary Table S3.** Sequences of 2'-O-methyl antisense oligos and LNA/DNA antisense oligos.

| Primers      | Sequence                                |
|--------------|-----------------------------------------|
| 2'OMe-miR21* | 5'- GUCAACAUCAGUCUGAUAAGCUA -3'         |
| 2'OMe-NC*    | 5'- AAGGCAAGCUGACCCUGAAGU -3'           |
| LNA-NC**     | 5'- CATTAAT <u>GTCGGACA</u> ACTCAAT -3' |

\* : All of bases are 2'-O-methylated RNA.

\*\* : LNAs are indicated by underline and other bases are DNA.

**Supplementary Table S4.** Primer pairs used for luciferase reporter vectors.

| Primers       | Sequence                                                                    |
|---------------|-----------------------------------------------------------------------------|
| pGL4.74-T21   | s <sup>+</sup> 5' - CTAGACCGGAATTCTCAACATCAGTCTGATAAGCTACTCGAGCGGAGGCCGG-3' |
| pGL4.74-T21   | a <sup>+</sup> 5' - CCTCCGCTCGAGTAGCTTATCAGACTGATGTTGAGAATTCCGGT-3'         |
| pGL4.74-T200c | s 5' - CTAGACCGGAATTCTCCATCATTACCCGGCAGTATTACTCGAGCGGAGGCCGG-3'             |
| pGL4.74-T200c | a 5' - CCTCCGCTCGAGTAATACTGCCGGGTAATGATGGAGAATTCCGGT-3'                     |
| pGL4.74-T16   | s 5' - CTAGACCGGAATTCCGCCAATATTTACGTGCTGCTACTCGAGCGGAGGCCGG-3'              |
| pGL4.74-T16   | a 5' - CCTCCGCTCGAGTAGCAGCACGTAAATATTGGCGGAATTCCGGT-3'                      |
| pGL4.74-T106b | s 5' - CTAGACCGGAATTCATCTGCACTGTCAGCACTTTACTCGAGCGGAGGCCGG-3'               |
| pGL4.74-T106b | a 5' - CCTCCGCTCGAGTAAAGTGCTGACAGTGCAGATGAATTCCGGT-3'                       |

s<sup>+</sup>; sense strand

a<sup>+</sup>; antisense strand

**Supplementary Table S5.** Primer pairs used for the construction of h7SK promoter TuD RNA shuttle vectors.

| Primers              | Sequence                                                                                                           |
|----------------------|--------------------------------------------------------------------------------------------------------------------|
| h7SK promoter PCR    | F <sup>+</sup> 5'- GGATCCTGCAGTATTTAGCATGCCCCA -3'                                                                 |
| h7SK promoter PCR    | R <sup>+</sup> 5'- GAATTCAAAAAAGGATGTGAGGGCGTCATCGAGACGGTACCGTCTCCGATGACGCCCTCACATCCGAGGTACCCAGGCGGGCGCACAAGC -3'  |
| h7SK TuD RNA shuttle | s <sup>+</sup> 5'- CTCGGATGTGAGGGCGTCATCGGAGACGACACCATCCACAGCCAGCGTCTCGATGACGCCCTCACATCCTTTTTTGAATTCA -3'          |
| h7SK TuD RNA shuttle | a <sup>+</sup> 5'- AGCTTGAATTCAAAAAAGGATGTGAGGGCGTCATCGAGACGCTGGCTGTGGATGGTGTTCGTCTCCGATGACGCCCTCACATCCGAGGTAC -3' |

F<sup>+</sup>; Forward primer

R<sup>+</sup>; Reverse primer

s<sup>+</sup>; sense strand

a<sup>+</sup>; antisense strand

**Supplementary Table S6.** Primer pairs used for TuD RNA expression vectors.

| Primers                        | Sequence                                                                                             |
|--------------------------------|------------------------------------------------------------------------------------------------------|
| TuD RNA-miR200c s <sup>+</sup> | 5'- CATCAACTCCATCATTACCCATTAGGCAGTATTACAAGTATTCTGGTCACAGAATACAACCTCCATCATTACCCATTAGGCAGTATTACAAG -3' |
| TuD RNA-miR200c a <sup>+</sup> | 5'- TCATCTTGTAATACTGCCTAATGGGTAATGATGGAGTTGTATTCTGTGACCAGAATACTTGTAATACTGCCTAATGGGTAATGATGGAGTT -3'  |
| TuD RNA-NC s                   | 5'- CATCAACTATCGCGAGTATCGACGTCGAGGCCCAAGTATTCTGGTCACAGAATACAACCTATCGCGAGTATCGACGTCGAGGCCCAAG -3'     |
| TuD RNA-NC a                   | 5'- TCATCTTGGGCCTCGACGTCGATACTCGCGATAGTTGTATTCTGTGACCAGAATACTTGGGCCTCGACGTCGATACTCGCGATAGTT -3'      |

s<sup>+</sup>; sense strand

a<sup>+</sup>; antisense strand

**Supplementary Table S7.** Primer pairs used for the detection of interferon response.

| Primers | Sequence                                     |
|---------|----------------------------------------------|
| OAS1    | F <sup>+</sup> 5'- AGGTGGTAAAGGGTGGCTCC -3'  |
| OAS1    | R <sup>+</sup> 5'- ACAACCAGGTCAGCGTCAGAT -3' |
| OAS2    | F 5'- ATCTGGATTTTGTGCCTAGTTC -3'             |
| OAS2    | R 5'- AACCACATGCTTGGTCTTTC -3'               |
| MX1     | F 5'- TCAGATGCACATGAGCTGG -3'                |
| MX1     | R 5'- GCACTCATGCTCCTAAAACAC -3'              |
| IRF9    | F 5'- GACTTGGTCAGGTACTTTCAGG -3'             |
| IRF9    | R 5'- TCTACACCAGGGACAGAATG -3'               |
| IFITM1  | F 5'- CCAAAGCCAGAAGATGCAC -3'                |
| IFITM1  | R 5'- GCTATGAAGCCCAGACAGC -3'                |
| GAPDH   | F 5'- ACTTTGTCAAGCTCATTTCCTG -3'             |
| GAPDH   | R 5'- CTCTCTCCTCTTGTGCTCTTG -3'              |

F<sup>+</sup>; Forward primer

R<sup>+</sup>; Reverse primer
